# Supplementary material for: Employing conservation of co-expression to improve functional inference
Source: Springer Nature journal article supplement (doi:10.1186/1752-0509-2-81), 2008-09-22
Supplement: 12918_2007_238_MOESM2_ESM.pdf [file 12918_2007_238_MOESM2_ESM.pdf]

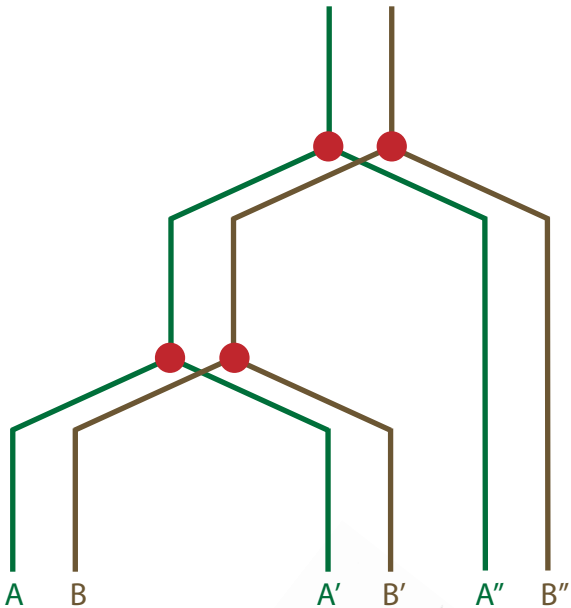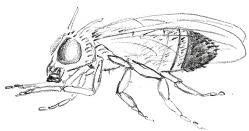

*D. melanogaster*

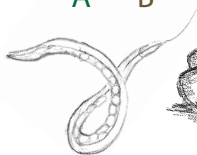

*C. elegans*

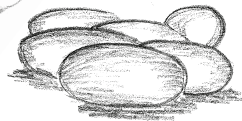

*S. cerevisiae*
