# Supplementary material for: Employing conservation of co-expression to improve functional inference
Source: Springer Nature journal article supplement (doi:10.1186/1752-0509-2-81), 2008-09-22

*S. cerevisiae*

1771 genes

1013 genes

697 genes

2065 genes

*D. melanogaster*

*C. elegans*

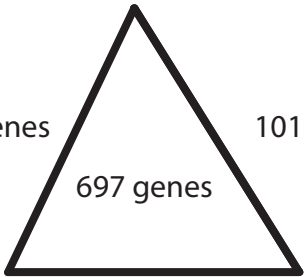

Supplement: 12918_2007_238_MOESM3_ESM.pdf [file 12918_2007_238_MOESM3_ESM.pdf]
